# Supplementary material for: Comparative assessment of methods for the fusion transcripts detection from RNA-Seq data
Source: PubMed Central journal article supplement (PMC4748267; doi:10.1038/srep21597), 2016-02-10
Supplement: srep21597-s1.pdf [file srep21597-s1.pdf]

# **Comparative assessment of methods for the fusion transcripts detection from RNA-Seq data**

Shailesh Kumar<sup>1</sup>, Angie Duy Vo<sup>1</sup>, Fujun Qin<sup>1</sup>, Hui Li<sup>1,2,\*</sup>

<sup>1</sup>Department of Pathology, School of Medicine, University of Virginia, Charlottesville, VA 22908

<sup>2</sup>Department of Biochemistry and Molecular Genetics, School of Medicine, University of Virginia, Charlottesville, VA 22908

**\*Corresponding author.**

E-mail: [hl9r@virginia.edu](mailto:hl9r@virginia.edu)

Web: <http://lilab.medicine.virginia.edu>

Phone: +1- 434-9826680

Fax: +1-434-2437244

Running title: Benchmarking software tools for fusion transcript detection

Keywords: fusion transcript, chimeric RNA, RNA-Seq,

# Supplementary Information

## List of Tables

**Supplementary Table S1:** False discoveries for the 12 tools. The total numbers of fusions detected on the negative dataset are listed. Numbers in the brackets indicate the unique gene pairs. \* Indicates that the software errors occurred in the handling of intermediate files, no final result was produced.

**Supplementary Table S2:** Number of overlapping fusions between all the 12 tools on the test dataset. **BE:** Bellerophonotes, **BF:** BreakFusion, **CH:** Chimerascan, **ER:** EricScript, **NF:** nFuse, **FC:** FusionCatcher, **FH:** FusionHunter, **FM:** FusionMap, **JA:** JAFFA, **MS:** MapSplice, **SF:** SOAPfuse, **TF:** TopHat-Fusion.

## List of Figures

**Supplementary Figure S1:** Comparison of time and computational memory used by software packages on the negative dataset. (a) Lib\_50\_R1, (b) Lib\_50\_R2, (c) Lib\_75\_R1, (d) Lib\_75\_R2, (e) Lib\_100\_R1, (f) Lib\_100\_R2. **BE:** Bellerophonotes, **CH:** Chimerascan, **ER:** EricScript, **NF:** nFuse, **FC:** FusionCatcher, **FH:** FusionHunter, **FM:** FusionMap, **JA:** JAFFA, **MS:** MapSplice, **SF:** SOAPfuse, **TF:** TopHat-Fusion.

**Supplementary Figure S2:** Comparison of time and computational memory, used by software packages on the mixed dataset. **BE:** Bellerophonotes, **ER:** EricScript, **NF:** nFuse, **FC:** FusionCatcher, **FH:** FusionHunter, **FM:** FusionMap, **JA:** JAFFA, **MS:** MapSplice, **TF:** TopHat-Fusion.

**Supplementary Figure S3:** Overlapping and unique fusions among the six best tools on the test dataset. **ER:** EricScript, **FC:** FusionCatcher, **JA:** JAFFA, **MS:** MapSplice, **SF:** SOAPfuse, **TF:** TopHat-Fusion.

## List of Sheets

**Supplementary Sheet S1:** Number of detected fusions, time and memory used by different tools on negative dataset.

**Supplementary Sheet S2:** A list of conformed fusions and common fusions detected by other tools on the test dataset.

**Supplementary Sheet S3:** Number of detected fusions, time and memory used by different tools on the test dataset.

**Supplementary Sheet S4:** TOPSIS analysis and calculation of final scores for the fusion detection tools on the mixed dataset.

**Supplementary Table S1:** False discoveries for the 12 tools. The total numbers of fusions detected on the negative dataset are listed. Numbers in the brackets indicate the unique gene pairs. \* Indicates that the software errors occurred in the handling of intermediate files, no final result was produced.

| <b>Tools</b>         | <b>Lib_50_R1</b> | <b>Lib_50_R2</b> | <b>Lib_75_R1</b> | <b>Lib_75_R2</b> | <b>Lib_100_R1</b> | <b>Lib_100_R2</b> |
|----------------------|------------------|------------------|------------------|------------------|-------------------|-------------------|
| <b>Bellerophon</b>   | 0                | 15465<br>(15430) | 0                | 0                | 0                 | 0                 |
| <b>BreakFusion</b>   | *                | *                | *                | *                | *                 | *                 |
| <b>Chimerascan</b>   | *                | 1600<br>(1540)   | *                | *                | *                 | *                 |
| <b>EricScript</b>    | *                | *                | *                | *                | *                 | *                 |
| <b>FusionCatcher</b> | 0                | 0                | 0                | 0                | 0                 | 0                 |
| <b>FusionHunter</b>  | 0                | 842 (767)        | 0                | 0                | 0                 | 0                 |
| <b>FusionMap</b>     | 93               | 27               | 24               | 27               | 81                | 83                |
| <b>JAFFA</b>         | 0                | 51(48)           | 0                | 0                | 0                 | 0                 |
| <b>MapSplice</b>     | 0                | 152              | 33               | 30               | 45                | 42                |
| <b>nFuse</b>         | 5                | 70(67)           | 39 (35)          | 31 (29)          | 54 (53)           | 78 (70)           |
| <b>SOAPfuse</b>      | *                | *                | *                | *                | *                 | *                 |
| <b>TopHat-Fusion</b> | 0                | 29 (25)          | 0                | 0                | 0                 | 0                 |

**Supplementary Table S2:** Number of overlapping fusions between the 12 tools on the test dataset. **BE:** Bellerophon, **BF:** BreakFusion, **CH:** Chimerascan, **ER:** EricScript, **NF:** nFuse, **FC:** FusionCatcher, **FH:** FusionHunter, **FM:** FusionMap, **JA:** JAFFA, **MS:** MapSplice, **SF:** SOAPfuse, **TF:** TopHat-Fusion.

| <b>Tools</b> | <b>BE</b> | <b>BF</b> | <b>CH</b> | <b>ER</b> | <b>FC</b> | <b>FH</b> | <b>FM</b> | <b>JA</b> | <b>MS</b> | <b>NF</b> | <b>SF</b> | <b>TF</b> |
|--------------|-----------|-----------|-----------|-----------|-----------|-----------|-----------|-----------|-----------|-----------|-----------|-----------|
| <b>BE</b>    | 1820      | 0         | 0         | 2         | 0         | 0         | 0         | 0         | 0         | 2         | 1         | 0         |
| <b>BF</b>    | 0         | 1401      | 5         | 4         | 0         | 173       | 1         | 2         | 2         | 1         | 3         | 0         |
| <b>CH</b>    | 0         | 5         | 463       | 43        | 9         | 5         | 7         | 14        | 7         | 1         | 42        | 5         |
| <b>ER</b>    | 2         | 4         | 43        | 474       | 14        | 1         | 9         | 13        | 8         | 1         | 38        | 6         |
| <b>FC</b>    | 0         | 0         | 13        | 14        | 19        | 0         | 11        | 14        | 11        | 1         | 19        | 9         |
| <b>FH</b>    | 0         | 173       | 5         | 1         | 0         | 287       | 0         | 0         | 0         | 1         | 2         | 0         |
| <b>FM</b>    | 0         | 1         | 7         | 9         | 7         | 0         | 16        | 10        | 9         | 1         | 8         | 5         |
| <b>JA</b>    | 0         | 2         | 14        | 13        | 9         | 0         | 10        | 485       | 10        | 1         | 12        | 6         |
| <b>MS</b>    | 0         | 2         | 7         | 8         | 7         | 0         | 9         | 10        | 25        | 2         | 8         | 4         |
| <b>NF</b>    | 2         | 1         | 1         | 1         | 1         | 1         | 1         | 1         | 2         | 150       | 1         | 2         |
| <b>SF</b>    | 1         | 3         | 42        | 38        | 14        | 2         | 8         | 12        | 8         | 1         | 85        | 6         |
| <b>TF</b>    | 0         | 0         | 5         | 6         | 5         | 0         | 5         | 6         | 4         | 2         | 6         | 11        |

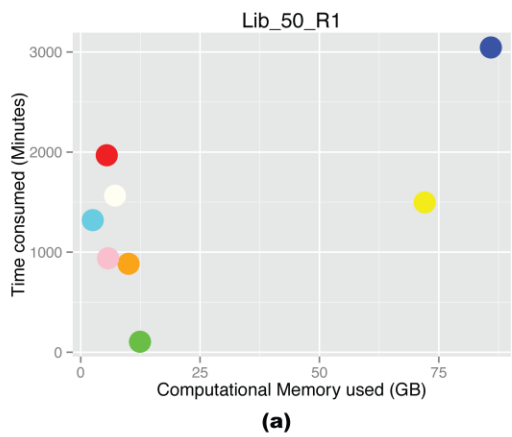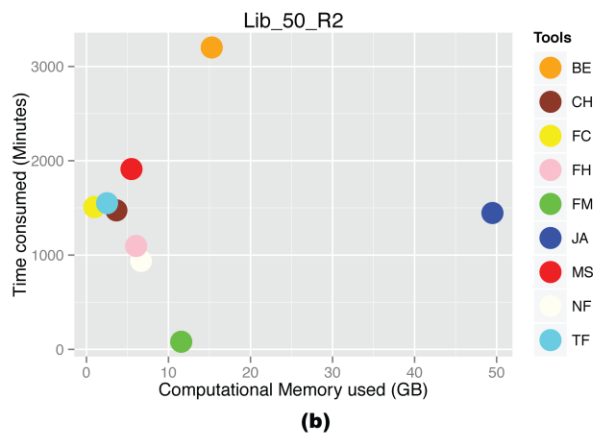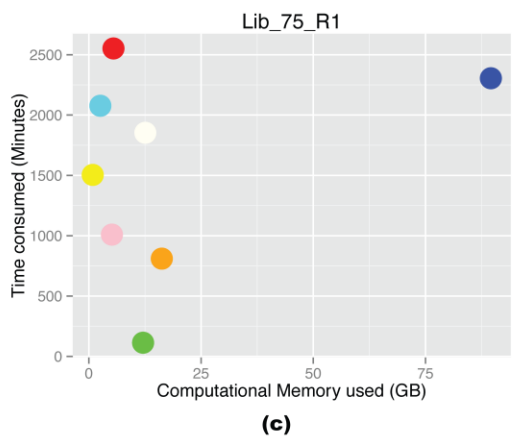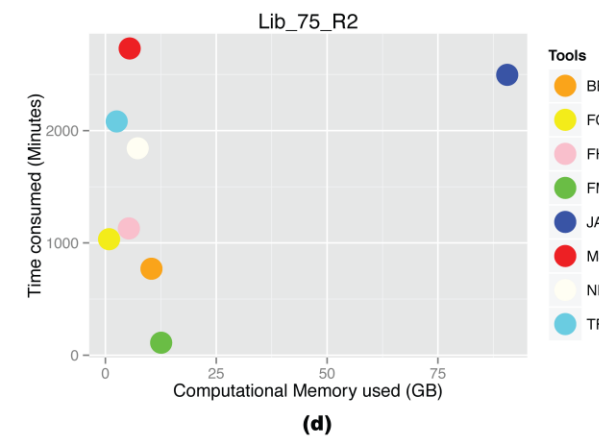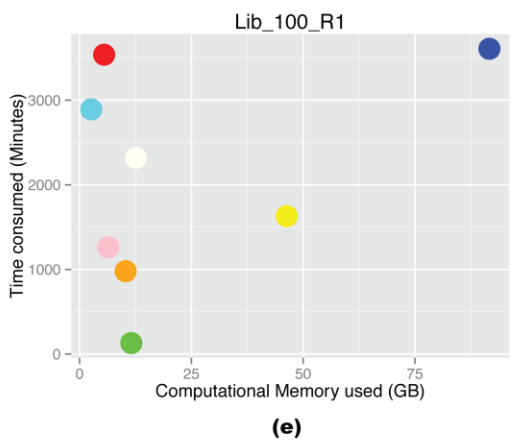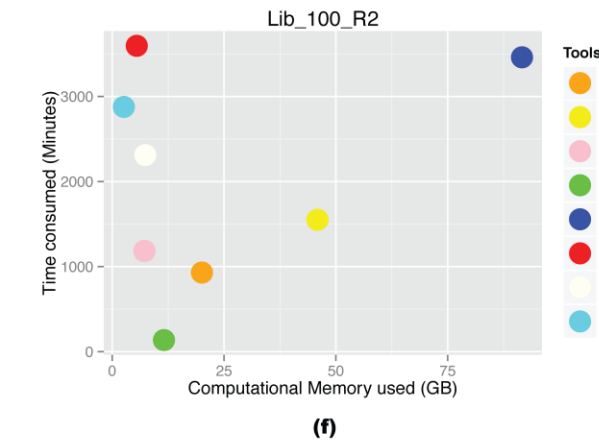

**Supplementary Figure S1: Comparison of time and computational memory used by software packages on the negative dataset.** (a) Lib\_50\_R1, (b) Lib\_50\_R2, (c) Lib\_75\_R1, (d) Lib\_75\_R2, (e) Lib\_100\_R1, (f) Lib\_100\_R2. **BE**: Bellerophon, **CH**: Chimerascan, **ER**: EricScript, **NF**: nFuse, **FC**: FusionCatcher, **FH**: FusionHunter, **FM**: FusionMap, **JA**: JAFFA, **MS**: MapSplice, **SF**: SOAPfuse, **TF**: TopHat-Fusion.

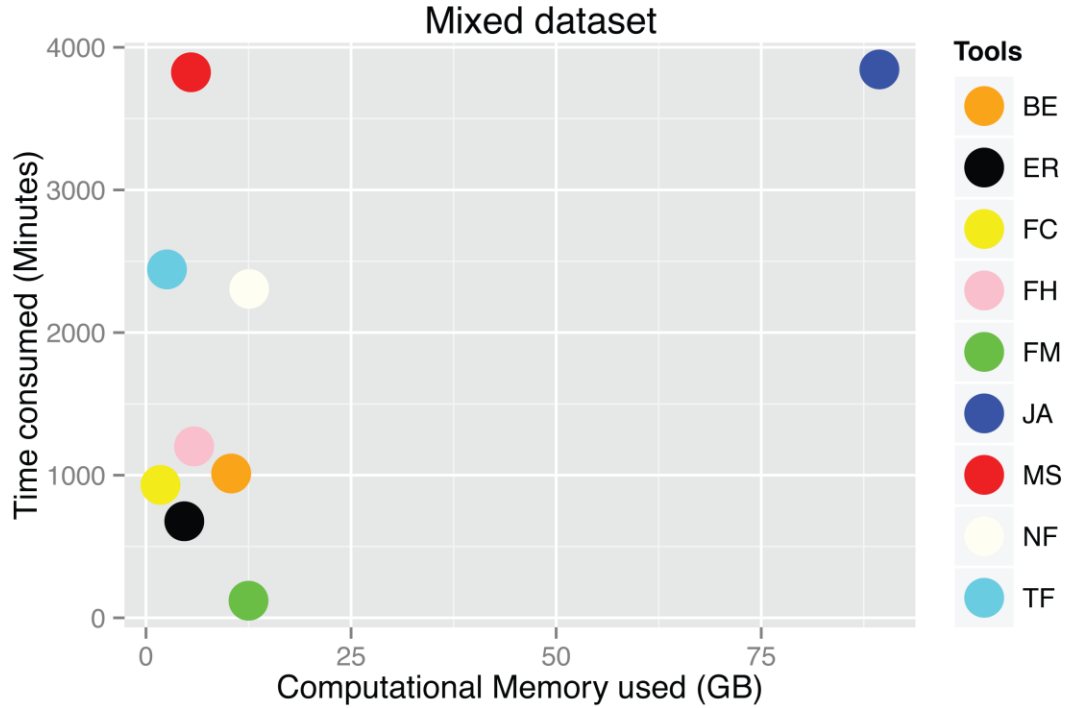

**Supplementary Figure S2: Comparison of time and computational memory, used by software packages on the mixed dataset. BE:** Bellerophontes, **ER:** EricScript, **NF:** nFuse, **FC:** FusionCatcher, **FH:** FusionHunter, **FM:** FusionMap, **JA:** JAFFA, **MS:** MapSplice, **TF:** TopHat-Fusion.

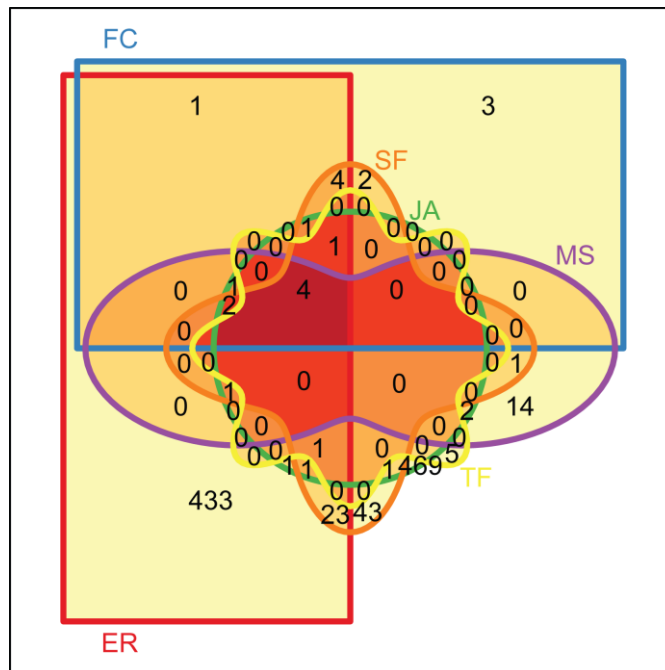

**Supplementary Figure S3: Overlapping and unique fusions among the six best tools on the test**

dataset. **ER**: EricScript, **FC**: FusionCatcher, **JA**: JAFFA, **MS**: MapSplice, **SF**: SOAPfuse, **TF**: TopHat-Fusion.
